# Supplementary material
Source: Springer Nature journal article supplement (https://www.springermedizin.de/resource/supplementary/12916_2010_328_MOESM1_ESM.pdf/9599646)

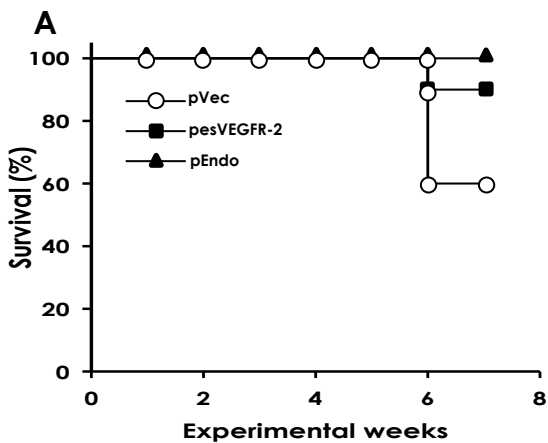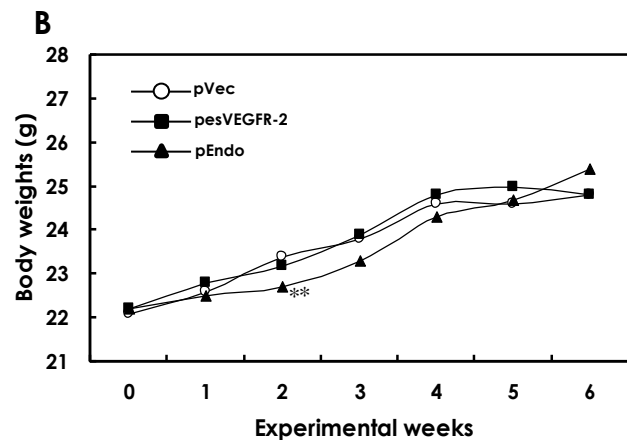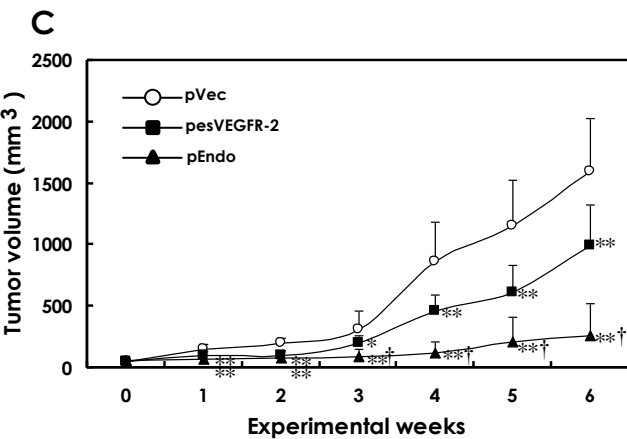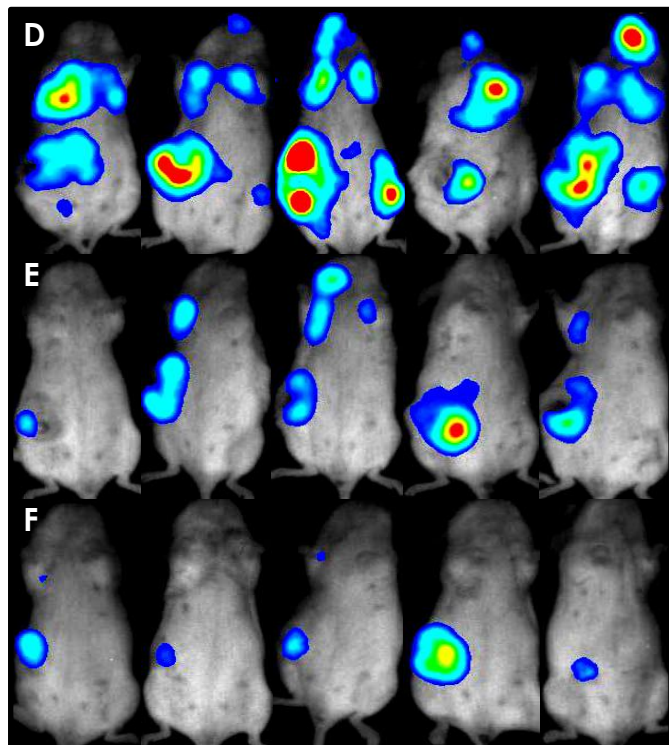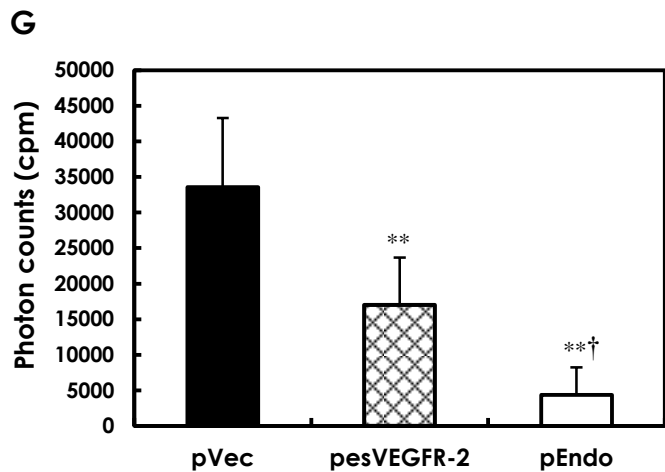

Supplement: MOESM1 [file 9599646]
